# Supplementary material for: Decrease in Heparan Sulphate Binding in Tropism-Retargeted Oncolytic Herpes Simplex Virus (ReHV) Delays Blood Clearance and Improves Systemic Anticancer Efficacy
Source: MDPI journal article supplement (doi:10.3390/cancers16061143), 2024-03-13
Supplement: s1 [file s1]

# Supplementary Materials: Decrease in Heparan Sulphate Binding in Tropism-Retargeted Oncolytic Herpes Simplex Virus (ReHV) Delays Blood Clearance and Improves Systemic Anticancer Efficacy

Andrea Vannini, Federico Parenti, Cristina Forghieri, Gaia Vannini, Catia Barboni, Anna Zaghini, Tatiana Gianni and Gabriella Campadelli-Fiume

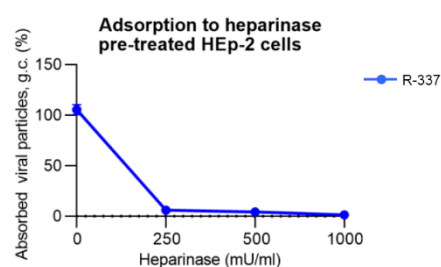

**Figure S1.** Inhibition of virus absorption to HEp-2 cells with reduced amounts of HS and CS. Details as Fig. 1C legend.
